# Supplementary material
Source: PubMed Central journal article supplement (PMC3885813)
Supplement: NIHMS540397-supplement-04.pdf [file NIHMS540397-supplement-04.pdf]

**Supplementary Table 1.** Primers used for RT-qPCR

| Gene  | Sequence F            | Sequence R          |
|-------|-----------------------|---------------------|
| ACTB  | cccgcgagtacaaccttct   | cgtcatccatggcgaact  |
| MLC1  | cctgaatccttcagccataaa | catgaggagctccaacagc |
| NKCC1 | cacgatgagctggaaaagg   | tcggcagtgtatgtgacca |
| KCC1  | ggagccattgagatcttgct  | cccgatgggtaaaagatgg |
| NBC   | atggacaggagatggaatgg  | ccaccctgtccactttctc |
